# Supplementary material
Source: PubMed Central journal article supplement (PMC8127396)
Supplement: NIHMS1685144-supplement-2.pdf [file NIHMS1685144-supplement-2.pdf]

Supplemental Figure 1. Impact of JAK2 or STAT3 inhibition plus mTOR blockade on DC-allostimulated human T cell production of IFN $\gamma$ , IL-13, and GM-CSF

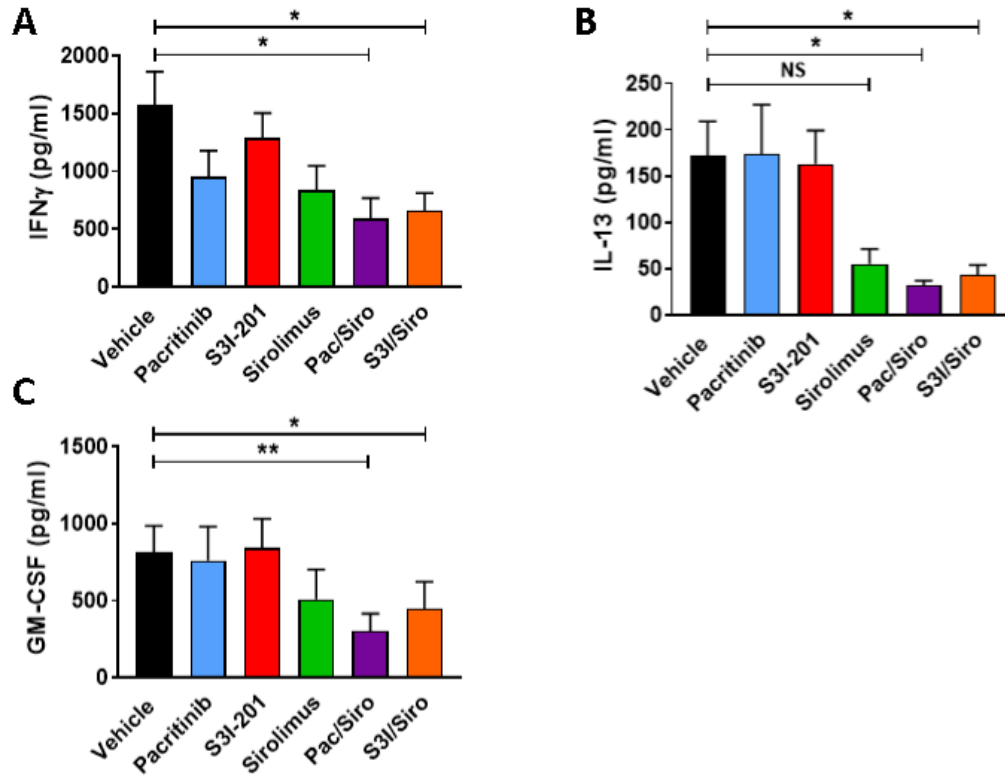

5-day alloMLRs were treated with DMSO vehicle control, pacritinib 1.25 $\mu$ M, S3I-201 5 $\mu$ M, sirolimus 10ng/ml, pacritinib plus sirolimus, or S3I-201 plus sirolimus. The graphs show the concentrations of IFN $\gamma$ , IL-13, and GM-CSF (mean $\pm$ SEM) as measured in the supernatants of the culture medium by a cytokine multiplex assay. n=5 experiments in triplicate. ANOVA. \* $P$ <0.05, \*\* $P$ =0.01-0.001.
