# Supplementary material
Source: PubMed Central journal article supplement (PMC8127396)

Supplemental Figure 2. Safety measures monitored on trial including (A) QTcF, (B) cardiac ejection fraction, (C) prothrombin time, (D) partial thromboplastin time, (E) and thrombin time

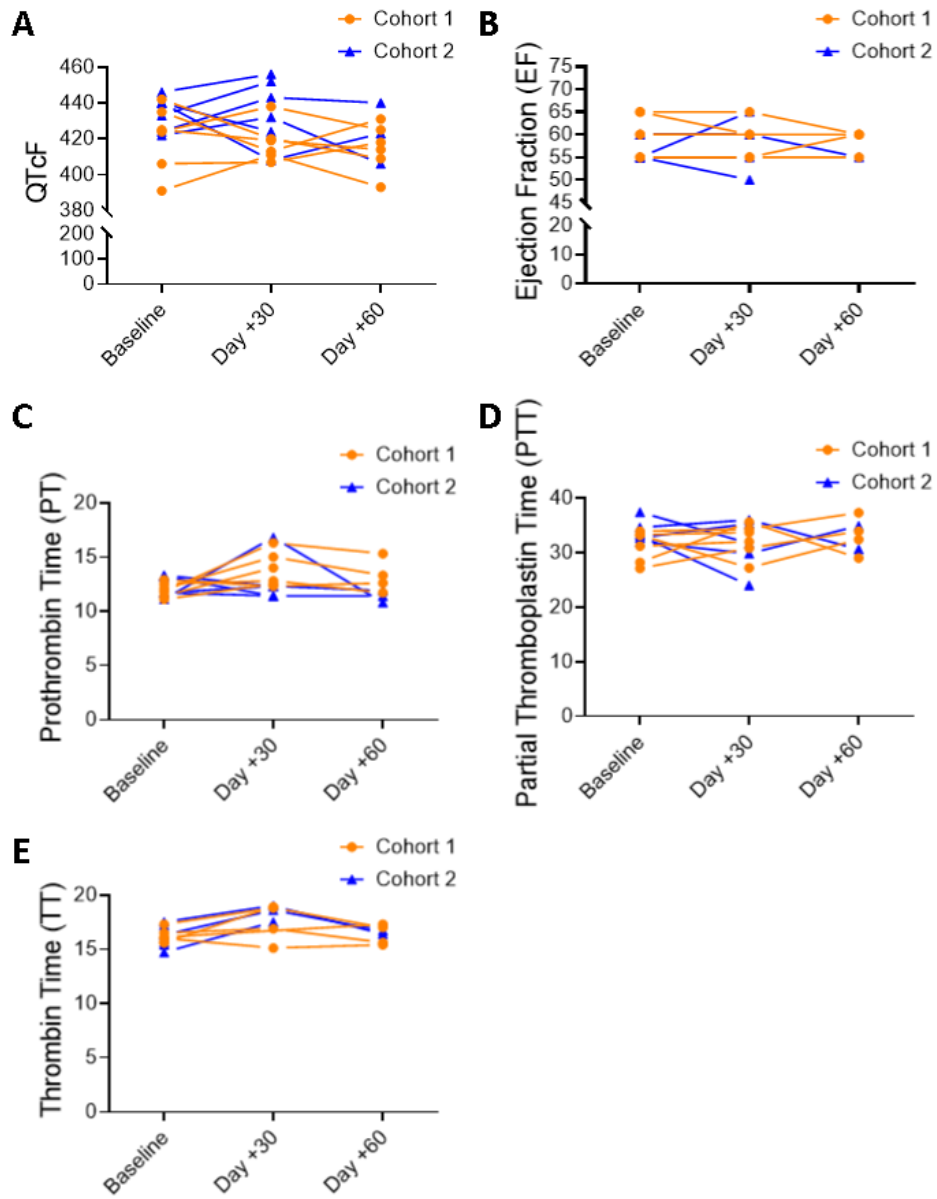

Supplement: NIHMS1685144-supplement-3.pdf [file NIHMS1685144-supplement-3.pdf]
