# Supplementary material
Source: PubMed Central journal article supplement (PMC8127396)

Supplemental Figure 3. Serial measures of absolute neutrophil count (ANC), hemoglobin (Hgb) and platelet counts (PLT) through complete pacritinib treatment period

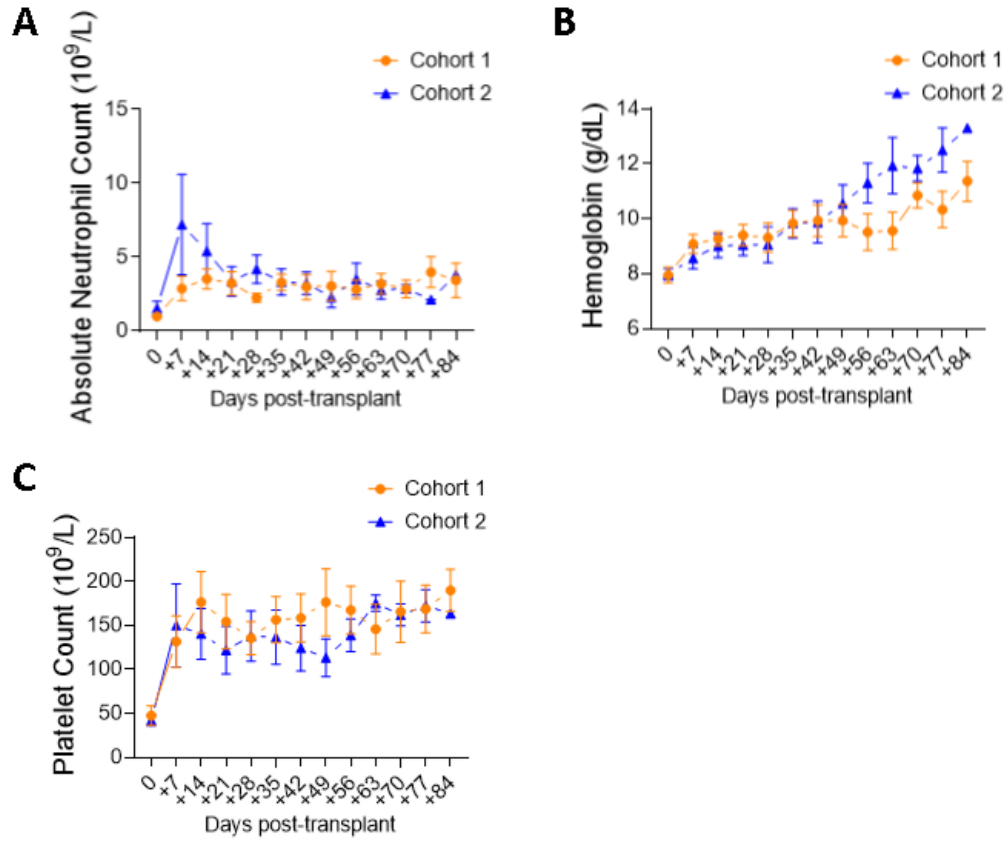

Supplement: NIHMS1685144-supplement-4.pdf [file NIHMS1685144-supplement-4.pdf]
