# Supplementary material
Source: PubMed Central journal article supplement (PMC8127396)
Supplement: NIHMS1685144-supplement-5.pdf [file NIHMS1685144-supplement-5.pdf]

Supplemental Figure 4. Impact of JAK2/mTOR blockade on human NK cell function and proliferation.

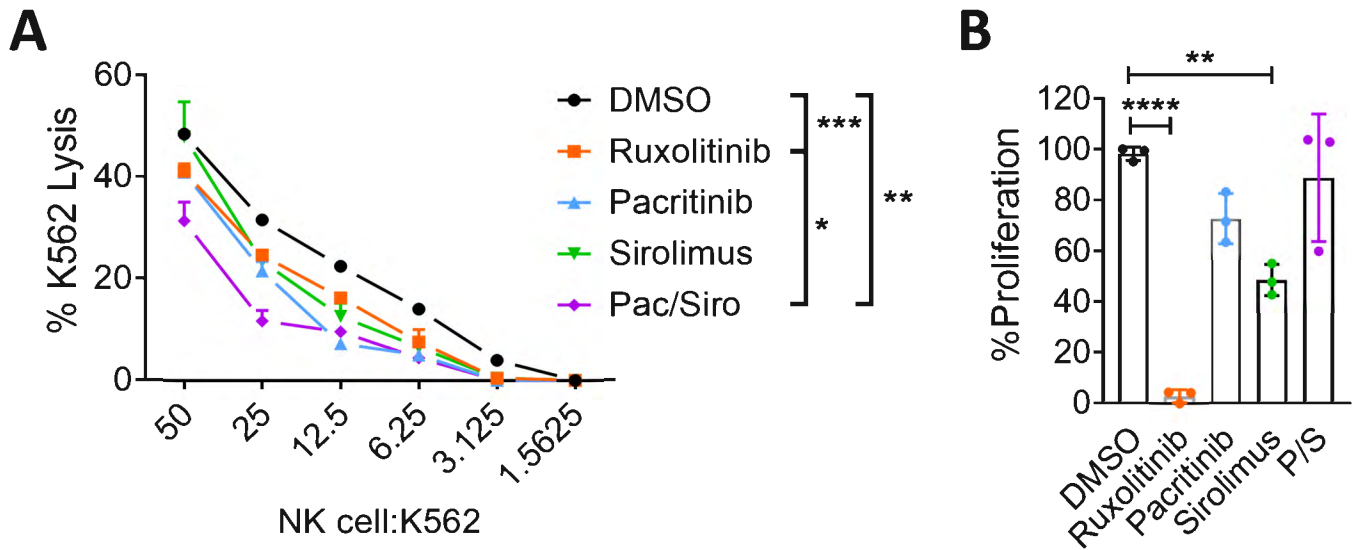

Human NK cells were isolated by magnetic bead purification ( $CD3^{neg}$ ,  $CD56^{+}$ ) from peripheral blood and cultured with K562 target cells at varying NK cell:K562 ratios. A) Graph shows the cytolytic activity ( $\pm$ SEM) of NK cells after 4 hours of culture with K562 target cells, while exposed to DMSO, ruxolitinib ( $1\mu M$ ), pacritinib ( $1.25\mu M$ ), sirolimus  $10ng/ml$ , or a combination of pacritinib plus sirolimus. K562 lysis was measured using a colorimetric assay. 1 representative experiment of 2 is shown. B) Human NK cells ( $10^5$ ) were stimulated with a cytokine cocktail of recombinant human (rh) IL-2 ( $200 IU/ml$ ) and rhIL-15 ( $10 ng/ml$ ), in the presence of DMSO, ruxolitinib, pacritinib, sirolimus, or pacritinib plus sirolimus. Drugs were added once on day 0. Cytokines were replenished on day +3. Bar graph shows NK cell proliferation ( $\pm$ SEM) on day +5 of the culture using a colorimetric assay.  $n=3$  independent experiments. ANOVA A and B. \* $P<0.05$ , \*\* $P=0.01-0.001$ , \*\*\* $P=0.001-0.0001$ , \*\*\*\* $P<0.0001$ .
