# Supplementary material
Source: PubMed Central journal article supplement (PMC8127396)
Supplement: NIHMS1685144-supplement-6.pdf [file NIHMS1685144-supplement-6.pdf]

Supplemental Figure 5. Impact of JAK2/mTOR blockade on human T cell responses toward CMV, EBV, Influenza, and tetanus stimulation.

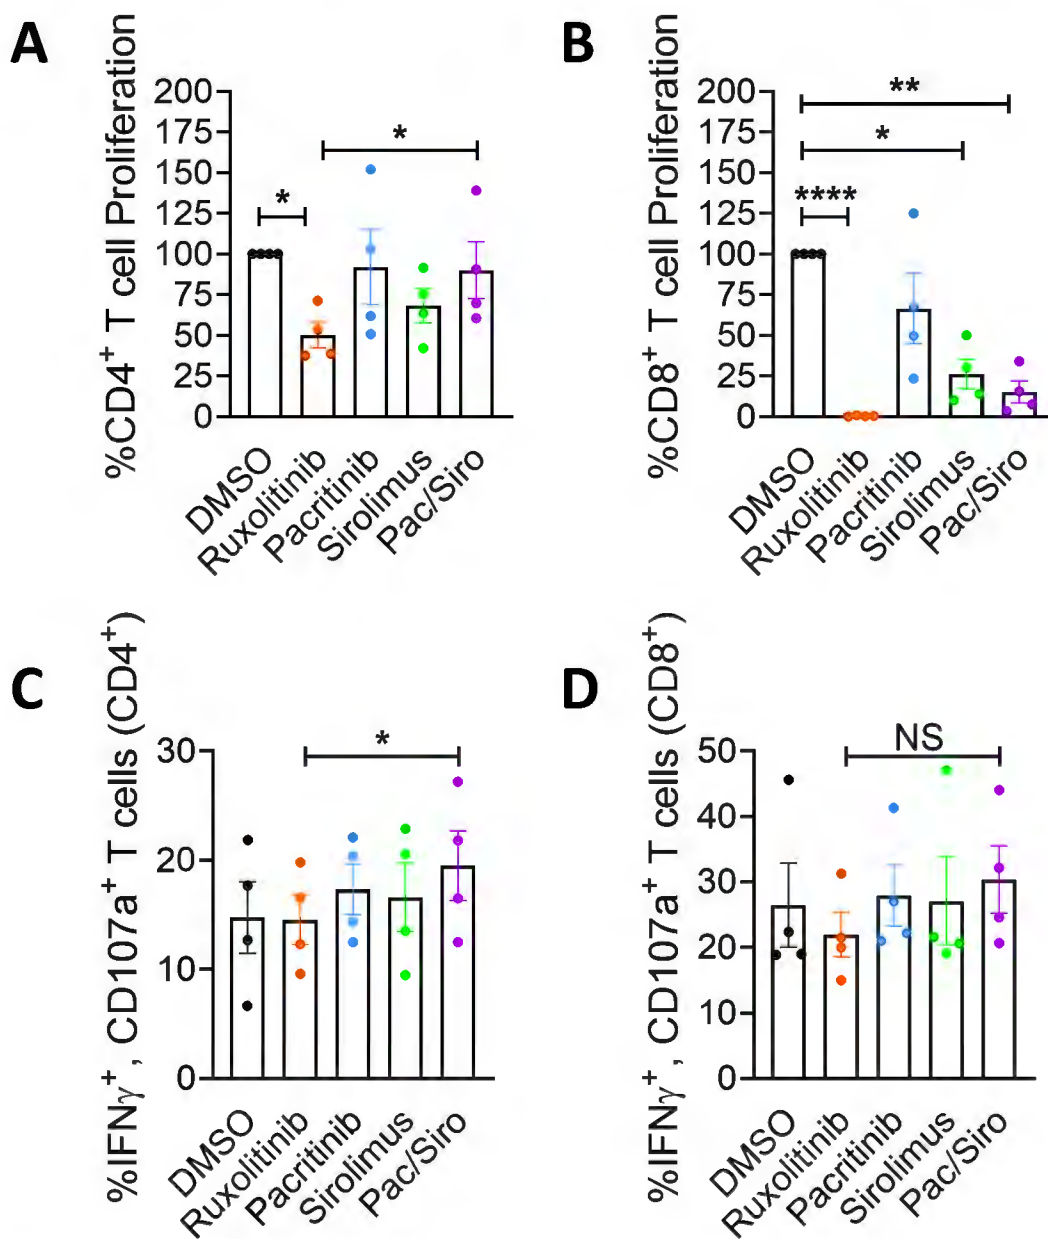

Human T cells were stimulated with Cytomegalovirus, Epstein-Barr virus, Influenza virus, and Clostridium tetani (CEFT) peptides according to manufacturer's (JPT) instructions for 4 days. DMSO vehicle control, ruxolitinib (1 $\mu$ M), pacritinib (1.25 $\mu$ M), sirolimus 10ng/ml, or a combination of pacritinib plus sirolimus were added once on day 0. The media was supplemented with IL-2 and IL-7 (10 ng/ml). Proliferation was determined by Ki-67 expression compared to unstimulated controls, using flow cytometry. A, B) Graphs show the recall proliferation of CD4<sup>+</sup> and CD8<sup>+</sup> T cell proliferation in response to CEFT peptides. C, D) Graph shows the frequency of IFN $\gamma$ <sup>+</sup>, CD107a<sup>+</sup> CD4<sup>+</sup> or CD8<sup>+</sup> T cells after stimulation with CEFT peptides. n=4 independent experiments. ANOVA A-D. \* $P$ <0.05, \*\* $P$ =0.01-0.001, and \*\*\*\* $P$ <0.0001. NS=not significant.
