# Supplementary material
Source: PubMed Central journal article supplement (PMC8127396)
Supplement: NIHMS1685144-supplement-8.pdf [file NIHMS1685144-supplement-8.pdf]

Supplemental Table 1. Patient characteristics

| Characteristic              | Dose level 1 (100mg daily),<br>n=6 | Dose level 2 (100mg BID),<br>n=6 |
|-----------------------------|------------------------------------|----------------------------------|
| Age                         | 63 (30-66)                         | 68 (60-73)                       |
| Gender                      |                                    |                                  |
| Female                      | 3 (50%)                            | 3 (50%)                          |
| Male                        | 3 (50%)                            | 3 (50%)                          |
| Race                        |                                    |                                  |
| White                       | 6 (100%)                           | 6 (100%)                         |
| Ethnicity                   |                                    |                                  |
| Non-Hispanic                | 6 (100%)                           | 6 (100%)                         |
| Disease                     |                                    |                                  |
| AML                         | 2 (33%)                            | 3 (50%)                          |
| MDS                         | 2 (33%)                            | 3 (50%)                          |
| ALL                         | 1 (17%)                            | 0 (0%)                           |
| MF                          | 1 (17%)                            | 0 (0%)                           |
| Response Status             |                                    |                                  |
| CR1                         | 3 (50%)                            | 2 (33%)                          |
| CRi                         | 0 (0%)                             | 1 (17%)                          |
| SD                          | 3 (50%)                            | 3 (50%)                          |
| KPS                         |                                    |                                  |
| 100                         | 1 (17%)                            | 1 (17%)                          |
| 90                          | 3 (50%)                            | 3 (50%)                          |
| 80                          | 2 (33%)                            | 2 (33%)                          |
| HCT-CI                      |                                    |                                  |
| 0-1                         | 5 (83%)                            | 5 (83%)                          |
| 3 or greater                | 1 (17%)                            | 1 (17%)                          |
| Conditioning Regimen        |                                    |                                  |
| Flu/Mel (RIC)               | 5 (83%)                            | 6 (100%)                         |
| Bu5300/Flu (MAC)            | 1 (17%)                            | 0 (0%)                           |
| Donor                       |                                    |                                  |
| Matched Related             | 1 (17%)                            | 1 (17%)                          |
| Matched Unrelated           | 5 (83%)                            | 5 (83%)                          |
| Graft                       |                                    |                                  |
| Peripheral Blood Stem Cells | 6 (100%)                           | 6 (100%)                         |
| Bone Marrow                 | 0 (0%)                             | 0 (0%)                           |
