# Supplementary material
Source: PubMed Central journal article supplement (PMC8127396)
Supplement: NIHMS1685144-supplement-9.pdf [file NIHMS1685144-supplement-9.pdf]

Supplemental Table 2. CMV donor (D) / recipient (R) serostatus and CMV reactivation.

| <b>Dose Level</b> | <b>CMV (D/R)</b> | <b>CMV Reactivation</b> |
|-------------------|------------------|-------------------------|
| 1                 | neg/neg          | No                      |
| 1                 | pos/pos          | No                      |
| 1                 | neg/pos          | No                      |
| 1                 | pos/neg          | No                      |
| 1                 | pos/pos          | No                      |
| 1                 | neg/pos          | Yes                     |
| 2                 | pos/pos          | No                      |
| 2                 | neg/pos          | No                      |
| 2                 | pos/pos          | No                      |
| 2                 | neg/neg          | No                      |
| 2                 | pos/neg          | No                      |
| 2                 | pos/pos          | No                      |
