# Supplementary material
Source: PubMed Central journal article supplement (PMC8127396)
Supplement: NIHMS1685144-supplement-10.pdf [file NIHMS1685144-supplement-10.pdf]

Supplemental Table 3. Adverse Events per CTCAE version 5

| Toxicity group                                  | AE type                         | Overall   | Grade_2   | Grade_3   |
|-------------------------------------------------|---------------------------------|-----------|-----------|-----------|
| Blood and lymphatic system disorders            | Febrile neutropenia             | 3 (25%)   | 0 (0%)    | 3 (25%)   |
| Gastrointestinal disorders                      | Abdominal pain                  | 1 (8.3%)  | 0 (0%)    | 1 (8.3%)  |
| Gastrointestinal disorders                      | Colitis                         | 2 (16.7%) | 0 (0%)    | 2 (16.7%) |
| Gastrointestinal disorders                      | Diarrhea                        | 3 (25%)   | 0 (0%)    | 3 (25%)   |
| Gastrointestinal disorders                      | Gastroesophageal reflux disease | 1 (8.3%)  | 0 (0%)    | 1 (8.3%)  |
| Gastrointestinal disorders                      | Mucositis oral                  | 1 (8.3%)  | 0 (0%)    | 1 (8.3%)  |
| Gastrointestinal disorders                      | Rectal pain                     | 1 (8.3%)  | 0 (0%)    | 1 (8.3%)  |
| Infections and infestations                     | Acinetobacter junii             | 1 (8.3%)  | 1 (8.3%)  | 0 (0%)    |
| Infections and infestations                     | Candida albicans                | 1 (8.3%)  | 1 (8.3%)  | 0 (0%)    |
| Infections and infestations                     | Clostridium difficile           | 2 (16.7%) | 2 (16.7%) | 0 (0%)    |
| Infections and infestations                     | Coronavirus                     | 2 (16.7%) | 2 (16.7%) | 0 (0%)    |
| Infections and infestations                     | Enterocolitis infectious        | 1 (8.3%)  | 0 (0%)    | 1 (8.3%)  |
| Infections and infestations                     | Escherichia coli                | 1 (8.3%)  | 1 (8.3%)  | 0 (0%)    |
| Infections and infestations                     | HHV-6                           | 1 (8.3%)  | 1 (8.3%)  | 0 (0%)    |
| Infections and infestations                     | Parainfluenza                   | 3 (25%)   | 3 (25%)   | 0 (0%)    |
| Infections and infestations                     | Pseudomonas aeruginosa          | 1 (8.3%)  | 1 (8.3%)  | 0 (0%)    |
| Infections and infestations                     | Respiratory syncytial virus     | 2 (16.7%) | 2 (16.7%) | 0 (0%)    |
| Infections and infestations                     | Rhinovirus                      | 4 (33.3%) | 4 (33.3%) | 0 (0%)    |
| Infections and infestations                     | Skin infection                  | 2 (16.7%) | 0 (0%)    | 2 (16.7%) |
| Infections and infestations                     | Soft tissue infection           | 1 (8.3%)  | 0 (0%)    | 1 (8.3%)  |
| Infections and infestations                     | Staphylococcus epidermidis      | 1 (8.3%)  | 1 (8.3%)  | 0 (0%)    |
| Infections and infestations                     | Streptococcus mitis             | 1 (8.3%)  | 0 (0%)    | 1 (8.3%)  |
| Investigations                                  | Investigations - Other          | 1 (8.3%)  | 0 (0%)    | 1 (8.3%)  |
| Musculoskeletal and connective tissue disorders | Pain in extremity               | 2 (16.7%) | 0 (0%)    | 2 (16.7%) |
| Skin and subcutaneous tissue disorders          | Rash maculopapular              | 1 (8.3%)  | 0 (0%)    | 1 (8.3%)  |
