# Supplementary material
Source: PubMed Central journal article supplement (PMC8127396)
Supplement: NIHMS1685144-supplement-11.pdf [file NIHMS1685144-supplement-11.pdf]

Supplemental Table 4. Donor chimerism in unsorted bone marrow, and peripheral blood CD3 and CD33 populations

---

|             | <b>Day +30</b> | <b>Day +90</b>  | <b>Day +180</b>   | <b>Day +365</b>  |
|-------------|----------------|-----------------|-------------------|------------------|
| <b>BM</b>   | 100 (97.6-100) | 100 (99-100)    | 100 (99.2-100)    | 99.95 (96.9-100) |
| <b>CD3</b>  | 100 (99.3-100) | 100 (83.26-100) | 99.965 (99.6-100) | 100 (100-100)    |
| <b>CD33</b> | 100 (100-100)  | 100 (99.46-100) | 100 (99.72-100)   | 100 (100-100)    |

---

\*median (range) presented for each
