# Supplementary material
Source: PubMed Central journal article supplement (PMC8127396)
Supplement: NIHMS1685144-supplement-12.pdf [file NIHMS1685144-supplement-12.pdf]

Supplemental Table 5. Study drug adherence during treatment period according to dose level

| <b>Dose level</b> | <b>Subject</b> | <b>Doses taken</b> | <b>Total doses possible</b> | <b>% compliance</b> | <b>Reason for discontinuation</b> |
|-------------------|----------------|--------------------|-----------------------------|---------------------|-----------------------------------|
| 1                 | 1              | 19                 | 82                          | 23.2%               | DLT                               |
| 1                 | 2              | 22                 | 82                          | 26.8%               | patient refusal                   |
| 1                 | 3              | 82                 | 82                          | 100%                | n/a                               |
| 1                 | 4              | 77                 | 82                          | 93.9%               | n/a                               |
| 1                 | 5              | 45                 | 82                          | 54.9%               | GI aGVHD                          |
| 1                 | 6              | 82                 | 82                          | 100%                | n/a                               |
| 2                 | 7              | 144                | 163                         | 88.3%               | n/a                               |
| 2                 | 8              | 162                | 163                         | 99.4%               | n/a                               |
| 2                 | 9              | 163                | 163                         | 100%                | n/a                               |
| 2                 | 10             | 48                 | 163                         | 29.4%               | Prolonged QTcF                    |
| 2                 | 11             | 33                 | 163                         | 20.2%               | Steroid-refractory aGVHD          |
| 2                 | 12             | 141                | 163                         | 86.5%               | Clostridium difficile diarrhea    |

\* Dose level 1 = pacritinib 100mg daily, dose level 2 = 100mg twice daily.
