# Supplementary material
Source: PubMed Central journal article supplement (PMC8127396)
Supplement: NIHMS1685144-supplement-13.pdf [file NIHMS1685144-supplement-13.pdf]

Supplemental Table 6. Pharmacokinetic analysis of pacritinib concentration over time

| Day | Dosing  | Variable | Units   | N  | Mean     | SD       | CV%   | Median   |
|-----|---------|----------|---------|----|----------|----------|-------|----------|
| D0  | 100 BID | AUClast  | h*ng/mL | 8  | 41774.9  | 13697.3  | 32.79 | 37398.1  |
|     |         | Cmax     | ng/mL   | 8  | 2585.8   | 705.4    | 27.28 | 2413.2   |
|     |         | Tmax     | h       | 8  | 22.5     | 4.2      | 18.86 | 24.00    |
| D0  | 100 QD  | AUClast  | h*ng/mL | 10 | 35347.7  | 12677.0  | 35.86 | 31803.9  |
|     |         | Cmax     | ng/mL   | 10 | 1939.9   | 588.8    | 30.35 | 1717.4   |
|     |         | Tmax     | h       | 10 | 10.4     | 8.0      | 77.35 | 8.00     |
| D21 | 100 BID | AUClast  | h*ng/mL | 5  | 216821.2 | 117279.3 | 54.09 | 190665.0 |
|     |         | Cmax     | ng/mL   | 5  | 9352.0   | 4931.5   | 52.73 | 8252.3   |
|     |         | Tmax     | h       | 5  | 13.6     | 10.0     | 73.82 | 12.00    |
| D21 | 100 QD  | AUClast  | h*ng/mL | 4  | 147191.4 | 58248.2  | 39.57 | 155676.2 |
|     |         | Cmax     | ng/mL   | 4  | 6603.8   | 2340.2   | 35.44 | 6860.1   |
|     |         | Tmax     | h       | 4  | 6.0      | 4.0      | 66.67 | 4.00     |

Plasma samples were analyzed using HPLC/MS/MS (Quinta Analytica) for pacritinib content using a total of 111 plasma samples. Pharmacokinetic parameters of pacritinib were calculated and presented here in table format. AUClast is equal to AUC(0-24h). Analysis of variance demonstrated no significant effect of dosing regimen (100mg daily vs. twice daily) at 5% significance level for AUC(0-24h).
