# Supplementary material
Source: PubMed Central journal article supplement (PMC8127396)
Supplement: NIHMS1685144-supplement-14.pdf [file NIHMS1685144-supplement-14.pdf]

Supplemental Table 7. Maximum acute GVHD organ stage and overall grade observed through day +100 after transplant

| Organ | Stage                | Frequency (N)        | % of total        |
|-------|----------------------|----------------------|-------------------|
| Skin  | 0                    | 7                    | 59%               |
|       | 1                    | 3                    | 25%               |
|       | 2                    | 1                    | 8%                |
|       | 3                    | 0                    | 0%                |
|       | 4                    | 1                    | 8%                |
| GI    | 0                    | 9                    | 75%               |
|       | 1                    | 2                    | 17%               |
|       | 2                    | 1                    | 8%                |
|       | 3                    | 0                    | 0%                |
|       | 4                    | 0                    | 0%                |
| Liver | 0                    | 12                   | 100%              |
|       | 1                    | 0                    | 0%                |
|       | 2                    | 0                    | 0%                |
|       | 3                    | 0                    | 0%                |
|       | 4                    | 0                    | 0%                |
|       | <b>Overall grade</b> | <b>Frequency (N)</b> | <b>% of total</b> |
|       | 0                    | 5                    | 42%               |
|       | I                    | 4                    | 33%               |
|       | II                   | 2                    | 17%               |
|       | III                  | 0                    | 0%                |
|       | IV                   | 1*                   | 8%                |

\*A single patient was affected by both GI stage 2 and skin stage 4, thus had an overall acute GVHD grade of IV.
