# Supplementary material
Source: PubMed Central journal article supplement (PMC8127396)
Supplement: NIHMS1685144-supplement-15.pdf [file NIHMS1685144-supplement-15.pdf]

Supplemental Table 8. Maximum chronic GVHD organ involvement and overall score per NIH Diagnosis and Staging Criteria through full extent of study follow up

| <b>Organ</b> | <b>Score</b> | <b>Frequency (N)</b> | <b>% of total</b> |
|--------------|--------------|----------------------|-------------------|
| Skin         | 0            | 12                   | 100%              |
|              | 1            | 0                    | 0%                |
|              | 2            | 0                    | 0%                |
|              | 3            | 0                    | 0%                |
| Mouth        | 0            | 11                   | 92%               |
|              | 1            | 1                    | 8%                |
|              | 2            | 0                    | 0%                |
|              | 3            | 0                    | 0%                |
| Eye          | 0            | 10                   | 83%               |
|              | 1            | 2                    | 17%               |
|              | 2            | 0                    | 0%                |
|              | 3            | 0                    | 0%                |
| GI           | 0            | 12                   | 100%              |
|              | 1            | 0                    | 0%                |
|              | 2            | 0                    | 0%                |
|              | 3            | 0                    | 0%                |
| Liver        | 0            | 12                   | 100%              |
|              | 1            | 0                    | 0%                |
|              | 2            | 0                    | 0%                |
|              | 3            | 0                    | 0%                |
| Lung         | 0            | 12                   | 100%              |
|              | 1            | 0                    | 0%                |
|              | 2            | 0                    | 0%                |
|              | 3            | 0                    | 0%                |
| Joint/Fascia | 0            | 12                   | 100%              |
|              | 1            | 0                    | 0%                |
|              | 2            | 0                    | 0%                |
|              | 3            | 0                    | 0%                |
| Genital      | 0            | 12                   | 100%              |
|              | 1            | 0                    | 0%                |
|              | 2            | 0                    | 0%                |
|              | 3            | 0                    | 0%                |
| Overall      | 0            | 9                    | 75%               |
|              | 1            | 3                    | 25%               |
|              | 2            | 0                    | 0%                |
|              | 3            | 0                    | 0%                |
